# Supplementary material for: Direct writing of a conducting polymer pattern in aqueous solution by using an ultrashort laser pulse
Source: Royal Society of Chemistry journal article supplement (doi:10.1039/c7ra05195f), 2017-01-01
Supplement: c7ra05195f1.pdf [file c7ra05195f1.pdf]

## Supplementary Materials

### Direct writing of a conducting polymer pattern in aqueous solution by using ultrashort pulse laser

Neha Agarwal<sup>a</sup>, Hyobong Ryu<sup>a</sup>, Melanie Mangang<sup>b</sup>, Wilhelm Pfleging<sup>b</sup> and Jungtae Kim<sup>a†</sup>

a. Korea Institute of Science and Technology Europe GmbH, Campus E7 1, 66123 Saarbrücken, Germany.

b. Applied Material Physics, Karlsruhe Institute of Technology, Hermann-von-Helmholtz-Platz 1, 76344 Eggenstein-Leopoldshafen, Germany

† Corresponding Author : [tais@kist-europe.de](mailto:tais@kist-europe.de)

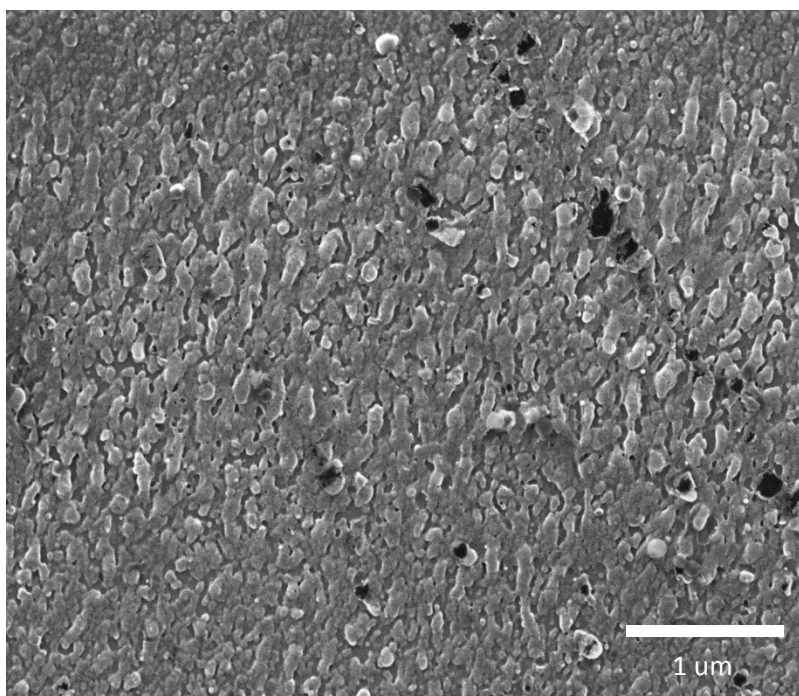

Figure S1. The surface morphology image of the polymerized Pyrrole-3-carboxylic acid (PCA) pattern by scanning electron microscopy.

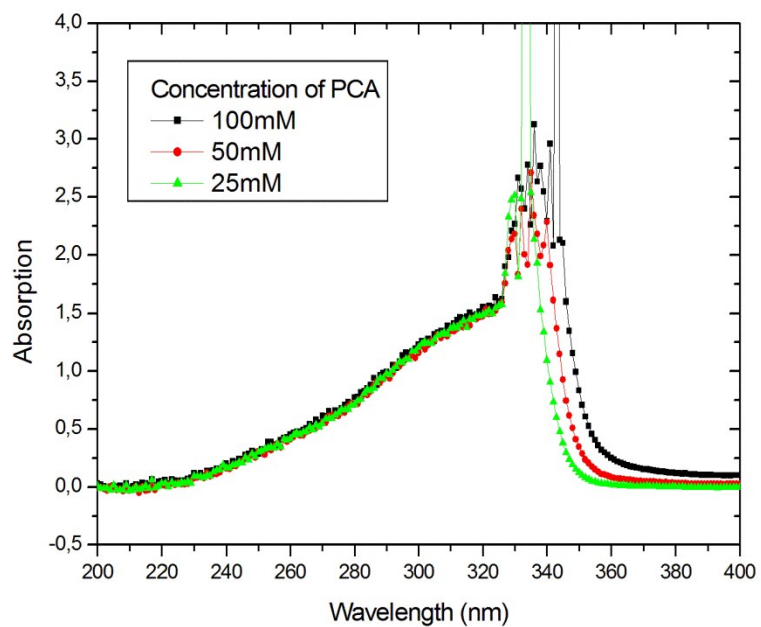

Figure S2. Result of UV-Vis spectrophotometer measurement for the PCA

We conducted preliminary test to know the adsorption properties of Pyrrole-3-carboxylic acid (PCA) with using UV-Vis spectrophotometer for the PCA polymerization. Figure S2. shows that absorption is dramatically decreased over the wavelength of 360 nm. The wavelength can be switched from fundamental (1030 nm) to 2nd (515 nm) or 3rd (343 nm) harmonics in the equipment we used. Therefore, the 343 nm wavelength was chosen for the whole experiment.

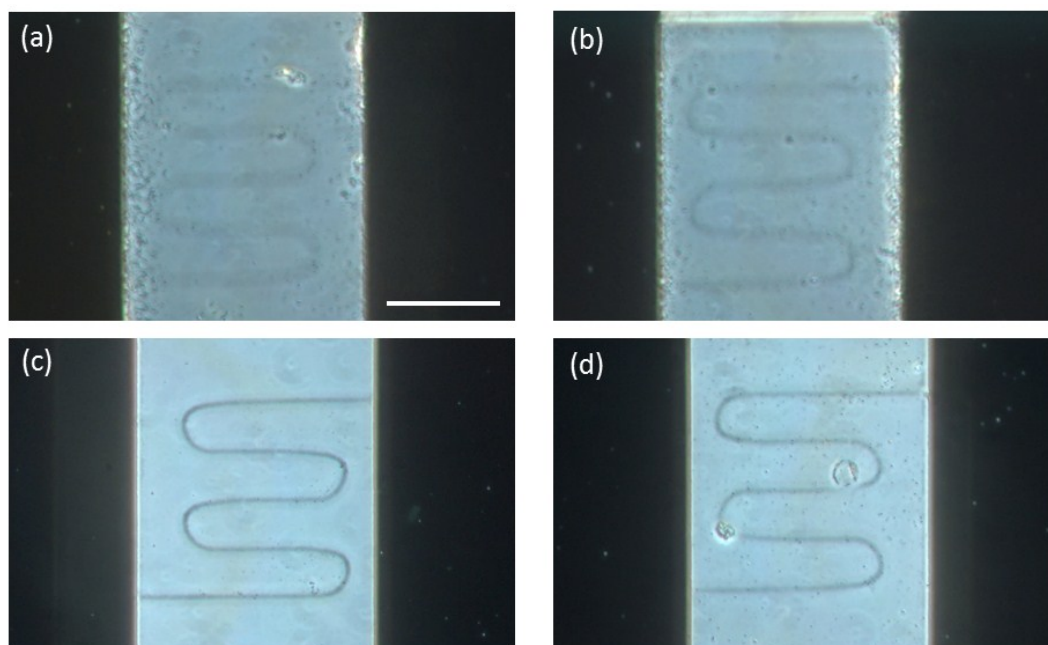

Figure S3. Microscopic images of the polymerized PCA patterns with different surface. (a,b)  $\text{-NH}_2$  terminated groups, (c,d)  $\text{-OH}$  terminated groups. Laser power is 0.6mW, speed is 100mm/s and number of the repeat is (a,c) 1000 and (b,d) 750. Scale bar : 100  $\mu\text{m}$

The surfaces of  $\text{-OH}$  functionalization and  $\text{-NH}_2$  functionalization are tested. As shown in Figure S3, the pattern of the conducting polymer on  $\text{-OH}$  surface has finer and cleaner shape than  $\text{-NH}_2$  functionalization.
